# Supplementary material for: Development of a Direct Headspace Collection Method from Arabidopsis Seedlings Using HS-SPME-GC-TOF-MS Analysis
Source: Metabolites. 2013 Apr 9;3(2):223–42. doi: 10.3390/metabo3020223 (PMC3901263; doi:10.3390/metabo3020223)
Supplement: Supplementary File 1 — Supplementary Tables (XLSX, 20 KB) [file metabolites-03-00223-s001.xlsx]

## Sheet: summary
	Supplementary table S1. Summary of the datasets used for this study.
		# of extracted peaks	# of annotated peaks	corresponding results
	Dataset 1	437	99	Figure 3; Table 1; Supplementary table S2
	Dataset 2	263	69	Figure 4; Figure 5; Table 2; Supplementary table S3

## Sheet: dataset 1
	Supplementary table S2. Annotated peaks in the profiles obtained by using HS-GC-TOF-MS (dataset 1).
	numbering_for_matrix	numbering_for_unique_peaks	synonym	RI
	VOCs003_ID001	VOCs003_cmb_ID001	3-Heptanone	883.3
	VOCs003_ID002	VOCs003_cmb_ID002	2-Heptanone	887.5
	VOCs003_ID008	VOCs003_cmb_ID008	Butanoic acid, 4-hydroxy-	910
	VOCs003_ID009	VOCs003_cmb_ID009	1,1-Dibromopropanone	911.5
	VOCs003_ID015	VOCs003_cmb_ID015	2-Hexanol, 2,5-dimethyl-, (S)-	930.6
	VOCs003_ID016	VOCs003_cmb_ID016	4-Octanone	935.5
	VOCs003_ID017	VOCs003_cmb_ID017	2-Heptanone, 4-methyl-	936.5
	VOCs003_ID028	VOCs003_cmb_ID028	Benzaldehyde	966.4
	VOCs003_ID031	VOCs003_cmb_ID031	3-Heptanone, 2,4-dimethyl-	973.7
	VOCs003_ID032	VOCs003_cmb_ID032	Cyclotetrasiloxane, octamethyl-	977.3
	VOCs003_ID033	VOCs003_cmb_ID033	433513_dihydromyrcenol_59	980.5
	VOCs003_ID043	VOCs003_cmb_ID043	Hexanal, 2-ethyl-	1003.6
	VOCs003_ID053	VOCs003_cmb_ID053	Benzene, (1-methylethyl)-	1027.1
	VOCs003_ID068	VOCs003_cmb_ID068	Nona-3,5-dien-2-ol	1064
	VOCs003_ID073	VOCs003_cmb_ID073	Acetophenone	1071.5
	VOCs003_ID076	VOCs003_cmb_ID076	Benzaldehyde, 4-methyl-	1075.4
	VOCs003_ID082	VOCs003_cmb_ID082	Benzaldehyde, 4-methyl-	1090.2
	VOCs003_ID084	VOCs003_cmb_ID084	Nonanal	1104.9
	VOCs003_ID085	VOCs003_cmb_ID085	2-Nonen-1-ol, (E)-	1106
	VOCs003_ID097	VOCs003_cmb_ID097	Cyclopentasiloxane, decamethyl-	1129.3
	VOCs003_ID101	VOCs003_cmb_ID101	2-Heptene, 5-ethyl-2,4-dimethyl-	1138.9
	VOCs003_ID108	VOCs003_cmb_ID108	2-Decanone	1150.3
	VOCs003_ID125	VOCs003_cmb_ID125	2-Methyl-2-decanol	1185
	VOCs003_ID126	VOCs003_cmb_ID126	4-Nonanone, 7-ethyl-	1191.7
	VOCs003_ID132	VOCs003_cmb_ID131	Pentanenitrile, 5-(methylthio)-	1202
	VOCs003_ID134	VOCs003_cmb_ID133	Decanal	1207.1
	VOCs003_ID145	VOCs003_cmb_ID143	2-Methyl-2-decanol	1231.2
	VOCs003_ID150	VOCs003_cmb_ID148	Benzothiazole	1240.8
	VOCs003_ID178	VOCs003_cmb_ID176	2-Undecanone	1292.6
	VOCs003_ID180	VOCs003_cmb_ID178	533704_56381_97	1295.9
	VOCs003_ID184	VOCs003_cmb_ID182	Undecanal	1308.7
	VOCs003_ID209	VOCs003_cmb_ID207	4-Dodecanone	1374.4
	VOCs003_ID216	VOCs003_cmb_ID214	3-Dodecanone	1389
	VOCs003_ID219	VOCs003_cmb_ID217	Biphenyl	1395.4
	VOCs003_ID223	VOCs003_cmb_ID221	Dodecanal	1410.6
	VOCs003_ID231	VOCs003_cmb_ID229	3-Dodecanol	1431.6
	VOCs003_ID232	VOCs003_cmb_ID230	2-Methyl-1-tetradecene	1432.6
	VOCs003_ID238	VOCs003_cmb_ID236	3-Isopropyl-5-methylhexan-2-one	1455.3
	VOCs003_ID246	VOCs003_cmb_ID244	n-Tridecan-1-ol	1474.6
	VOCs003_ID253	VOCs003_cmb_ID251	Tridecanone<2->	1495.4
	VOCs003_ID256	VOCs003_cmb_ID253	1,1'-Biphenyl, 4-methyl-	1501.3
	VOCs003_ID261	VOCs003_cmb_ID258	1,1'-Biphenyl, 4-methyl-	1512.2
	VOCs003_ID262	VOCs003_cmb_ID259	Tetradecanal	1513
	VOCs003_ID278	VOCs003_cmb_ID275	Pentadecane, 3-methyl-	1571.7
	VOCs003_ID279	VOCs003_cmb_ID276	6-Tetradecanone	1573
	VOCs003_ID286	VOCs003_cmb_ID283	2-Butenedioic acid (E)-, dibutyl ester	1581.9
	VOCs003_ID292	VOCs003_cmb_ID289	Hexadecene<1->	1593
	VOCs003_ID293	VOCs003_cmb_ID290	2-Tetradecanone	1597.2
	VOCs003_ID296	VOCs003_cmb_ID293	Tetradecanal	1615.1
	VOCs003_ID297	VOCs003_cmb_ID294	Dodecanoic acid, 1-methylethyl ester	1623.2
	VOCs003_ID298	VOCs003_cmb_ID295	659994_45485_355	1623.4
	VOCs003_ID299	VOCs003_cmb_ID296	2,6-Bis(1,1-dimethylethyl)-4-(1-oxopropyl)phenol	1628.7
	VOCs003_ID301	VOCs003_cmb_ID298	4-Tridecene, (Z)-	1634.3
	VOCs003_ID306	VOCs003_cmb_ID303	Benzophenone	1648.8
	VOCs003_ID308	VOCs003_cmb_ID305	1-Decanol, 5,9-dimethyl-	1657.6
	VOCs003_ID309	VOCs003_cmb_ID306	.tau.-Cadinol	1663.4
	VOCs003_ID318	VOCs003_cmb_ID315	728994_64822_147	1683.7
	VOCs003_ID324	VOCs003_cmb_ID321	Benzene, (1-methyldecyl)-	1710.6
	VOCs003_ID325	VOCs003_cmb_ID322	PR_MST_ketone (aliphatic)_1717.3	1717.3
	VOCs003_ID326	VOCs003_cmb_ID323	Oxirane, tetradecyl-	1718
	VOCs003_ID327	VOCs003_cmb_ID324	Naphthalene, 1,2,3-trimethyl-4-propenyl-, (E)-	1720.8
	VOCs003_ID332	VOCs003_cmb_ID329	PR_MST_alkane_1743.9	1743.9
	VOCs003_ID338	VOCs003_cmb_ID335	PR_MST_alkane_1764	1764
	VOCs003_ID341	VOCs003_cmb_ID338	711313_46026_147	1775.3
	VOCs003_ID346	VOCs003_cmb_ID343	1-Nonadecene	1793.1
	VOCs003_ID350	VOCs003_cmb_ID346	Benzene, (1-methylundecyl)-	1814.1
	VOCs003_ID352	VOCs003_cmb_ID348	Isopropyl tetradecanoate	1821.5
	VOCs003_ID359	VOCs003_cmb_ID355	Octadecane, 4-methyl-	1857.6
	VOCs003_ID362	VOCs003_cmb_ID358	Octadecane, 2-methyl-	1863.7
	VOCs003_ID363	VOCs003_cmb_ID359	1,2-Benzenedicarboxylic acid, bis(2-methylpropyl) ester	1865.2
	VOCs003_ID370	VOCs003_cmb_ID366	cis,cis,cis-7,10,13-Hexadecatrienal	1899.4
	VOCs003_ID374	VOCs003_cmb_ID370	Benzene, (1-methyldodecyl)-	1918.5
	VOCs003_ID375	VOCs003_cmb_ID371	757071_45505_147	1920.5
	VOCs003_ID376	VOCs003_cmb_ID372	PR_MST_ketone (aliphatic)_1922.1	1922.1
	VOCs003_ID377	VOCs003_cmb_ID373	Hexadecanoic acid, methyl ester	1924.4
	VOCs003_ID379	VOCs003_cmb_ID375	254892_51473_32	1932.3
	VOCs003_ID386	VOCs003_cmb_ID382	Dibutyl phthalate	1960.9
	VOCs003_ID402	VOCs003_cmb_ID397	798712_60124_73	2059.3
	VOCs003_ID408	VOCs003_cmb_ID403	Morpholine, 4-octadecyl-	2097.9
	VOCs003_ID419	VOCs003_cmb_ID414	Naphthalene, 1-(phenylmethoxy)-	2379.4
	VOCs003_ID421	VOCs003_cmb_ID416	867915_49312_73	2385.8
	VOCs003_ID438	VOCs003_cmb_ID433	Morpholine, 4-octadecyl-	2901.8

## Sheet: dataset 2
	Supplementary table S3. Annotated peaks in the profiles obtained by using HS-GC-TOF-MS (dataset 2).
	numbering_for_matrix	numbering_for_unique_peaks	synonym	RI
	VOCs002_ID002	VOCs002_cmb_ID002	Methane, tribromo-	894.4
	VOCs002_ID003	VOCs002_cmb_ID003	Methane, tribromo-	898.9
	VOCs002_ID006	VOCs002_cmb_ID005	352103_68242_151	913.4
	VOCs002_ID012	VOCs002_cmb_ID011	240814_50530_77	947.8
	VOCs002_ID015	VOCs002_cmb_ID014	240814_50530_77	960.9
	VOCs002_ID019	VOCs002_cmb_ID018	240814_50530_77	976
	VOCs002_ID020	VOCs002_cmb_ID019	Cyclotetrasiloxane, octamethyl-	979.5
	VOCs002_ID022	VOCs002_cmb_ID021	433513_dihydromyrcenol_59	987.1
	VOCs002_ID023	VOCs002_cmb_ID022	Cyclotetrasiloxane, octamethyl-	989
	VOCs002_ID024	VOCs002_cmb_ID023	Cyclotetrasiloxane, octamethyl-	994.3
	VOCs002_ID030	VOCs002_cmb_ID029	Heptane, 2,2,4,6,6-pentamethyl-	1025.3
	VOCs002_ID031	VOCs002_cmb_ID030	1-Hexanol, 2-ethyl-	1030.6
	VOCs002_ID036	VOCs002_cmb_ID035	422843_45514_193	1061.2
	VOCs002_ID038	VOCs002_cmb_ID037	Heptane, 5-ethyl-2,2,3-trimethyl-	1068.8
	VOCs002_ID041	VOCs002_cmb_ID040	Heptane, 5-ethyl-2,2,3-trimethyl-	1082.7
	VOCs002_ID043	VOCs002_cmb_ID042	1-(2,4-Dimethyl-furan-3-yl)-ethanone	1093.9
	VOCs002_ID045	VOCs002_cmb_ID044	Nonanal<n->	1108
	VOCs002_ID048	VOCs002_cmb_ID047	Decane, 2,2,5-trimethyl-	1123.1
	VOCs002_ID049	VOCs002_cmb_ID048	Decane, 2,2,4-trimethyl-	1126.2
	VOCs002_ID050	VOCs002_cmb_ID049	456395_45361_73	1132.6
	VOCs002_ID057	VOCs002_cmb_ID056	4-Methylpentyl isothiocyanate	1167.5
	VOCs002_ID062	VOCs002_cmb_ID061	Decanone<2->	1195.2
	VOCs002_ID063	VOCs002_cmb_ID062	Ethanone, 1-(3-methylphenyl)-	1196.7
	VOCs002_ID070	VOCs002_cmb_ID069	1H-Indene, 2,3-dihydro-1,1,5,6-tetramethyl-	1227.6
	VOCs002_ID080	VOCs002_cmb_ID079	Heptane, 1-isothiocyanato-	1269.5
	VOCs002_ID082	VOCs002_cmb_ID081	Decane, 2,3,5,8-tetramethyl-	1280.3
	VOCs002_ID084	VOCs002_cmb_ID083	1H-Indole, 1-methoxy-	1285.5
	VOCs002_ID089	VOCs002_cmb_ID088	Cyclohexasiloxane, dodecamethyl-	1299
	VOCs002_ID096	VOCs002_cmb_ID094	Decane, 2,3,5,8-tetramethyl-	1345
	VOCs002_ID101	VOCs002_cmb_ID099	Propanoic acid, 2-methyl-, 2,2-dimethyl-1-(2-hydroxy-1-methylethyl)propyl ester	1362.4
	VOCs002_ID103	VOCs002_cmb_ID101	564341_62934_327	1374.5
	VOCs002_ID105	VOCs002_cmb_ID103	Propanoic acid, 2-methyl-, 3-hydroxy-2,4,4-trimethylpentyl ester	1383.2
	VOCs002_ID107	VOCs002_cmb_ID105	2-Dodecanone	1398.2
	VOCs002_ID110	VOCs002_cmb_ID108	Dodecanal	1415
	VOCs002_ID117	VOCs002_cmb_ID115	Naphthalene, 2,6-dimethyl-	1448.5
	VOCs002_ID121	VOCs002_cmb_ID119	601017_46315_147	1465.8
	VOCs002_ID122	VOCs002_cmb_ID120	2,5-Cyclohexadiene-1,4-dione, 2,6-bis(1,1-dimethylethyl)-	1477
	VOCs002_ID123	VOCs002_cmb_ID121	n-Tridecan-1-ol	1479.4
	VOCs002_ID125	VOCs002_cmb_ID123	4-(2,6,6-Trimethylcyclohexa-1,3-dienyl)but-3-en-2-one	1490
	VOCs002_ID126	VOCs002_cmb_ID124	3-Buten-2-one, 4-(2,6,6-trimethyl-1-cyclohexen-1-yl)-, (E)-	1493.6
	VOCs002_ID128	VOCs002_cmb_ID126	Amorphane<cis-4,10-epoxy->	1502.6
	VOCs002_ID130	VOCs002_cmb_ID128	Phenol, 2,4-bis(1,1-dimethylethyl)-	1513.3
	VOCs002_ID137	VOCs002_cmb_ID135	Dodecane, 2,6,11-trimethyl-	1540.2
	VOCs002_ID138	VOCs002_cmb_ID136	Calamenene<cis->	1543.1
	VOCs002_ID143	VOCs002_cmb_ID141	642292_47409_59	1567.6
	VOCs002_ID144	VOCs002_cmb_ID142	1(2H)-Naphthalenone, 5-ethyl-3,4-dihydro-	1570.1
	VOCs002_ID149	VOCs002_cmb_ID147	Cadina-1(10),6,8-triene	1600.4
	VOCs002_ID152	VOCs002_cmb_ID150	Tetradecanal	1620
	VOCs002_ID154	VOCs002_cmb_ID152	659994_45485_355	1628.4
	VOCs002_ID156	VOCs002_cmb_ID154	630956_cadinene (delta-)_134	1633.7
	VOCs002_ID162	VOCs002_cmb_ID160	Naphthalene, 1,2,4a,5,6,8a-hexahydro-4,7-dimethyl-1-(1-methylethyl)-, (1π4aπ8aπ-	1666.1
	VOCs002_ID163	VOCs002_cmb_ID161	678844_47426_161	1668.5
	VOCs002_ID166	VOCs002_cmb_ID164	.tau.-Cadinol	1680.2
	VOCs002_ID170	VOCs002_cmb_ID168	Naphthalene, 1,6-dimethyl-4-(1-methylethyl)-	1698.1
	VOCs002_ID172	VOCs002_cmb_ID170	Hexadecanal	1722.6
	VOCs002_ID173	VOCs002_cmb_ID171	1,1'-Biphenyl, 2,2',5,5'-tetramethyl-	1726.1
	VOCs002_ID174	VOCs002_cmb_ID172	Calamenen-10-one<10-nor->	1731.4
	VOCs002_ID190	VOCs002_cmb_ID188	2-Pentadecanone, 6,10,14-trimethyl-	1848.4
	VOCs002_ID194	VOCs002_cmb_ID192	Phthalic acid, decyl isobutyl ester	1870.7
	VOCs002_ID200	VOCs002_cmb_ID198	757465_46845_73	1925.9
	VOCs002_ID205	VOCs002_cmb_ID203	n-Hexadecanoic acid	1962.9
	VOCs002_ID224	VOCs002_cmb_ID222	798610_45515_147	2065.1
	VOCs002_ID230	VOCs002_cmb_ID228	7-Isopropyl-1,1,4a-trimethyl-1,2,3,4,4a,9,10,10a-octahydrophenanthrene	2090.6
	VOCs002_ID242	VOCs002_cmb_ID240	Podocarp-7-en-3-one, 13πmethyl-13-vinyl-	2373.5
	VOCs002_ID244	VOCs002_cmb_ID242	1018655_45527_147	2391.5
	VOCs002_ID245	VOCs002_cmb_ID243	Podocarp-7-en-3-one, 13πmethyl-13-vinyl-	2394.6
	VOCs002_ID263	VOCs002_cmb_ID261	Abietal<dehydro->	2698.8
	VOCs002_ID265	VOCs002_cmb_ID263	867915_49312_73	2928.6
	VOCs002_ID273	VOCs002_cmb_ID271	1-Phenanthrenecarboxylic acid, 1,2,3,4,4a,9,10,10a-octahydro-1,4a-dimethyl-7-(1-methylethyl)-, methyl ester, [1R-(1π4aπ10aπ]-	2968.2
